# Supplementary material
Source: PubMed Central journal article supplement (PMC5710246)
Supplement: jamapsychiatry-74-712-s001.pdf [file jamapsychiatry-74-712-s001.pdf]

## Supplementary Online Content

Singh-Manoux A, Dugravot A, Fournier A, et al. Trajectories of depressive symptoms before diagnosis of dementia: a 28-year follow-up study. *JAMA Psychiatry*. Published online May 17, 2017. doi:10.1001/jamapsychiatry.2017.0660

**eTable 1.** Association of Depressive Symptoms (at Ages 50 & 70 y) and Incidence of Dementia.

**eTable 2.** Difference GHQ-30 and CES-D Scores in the Years Preceding Dementia Between Dementia Cases and Others.

**eFigure 1.** Trajectory of Global Cognitive Score in Dementia Cases and Other Participants in the Years Leading to Dementia Diagnosis.

**eFigure 2.** Study Design to Assess Association of Dementia Risk With GHQ Caseness\* and GHQ-30 Trajectories.

**eFigure 3.** Trajectories of Depressive Symptoms Preceding Dementia Using Cubic Regression Splines.

This supplementary material has been provided by the authors to give readers additional information about their work.

**eTable 1.** Association of Depressive Symptoms (at Ages 50 & 70 y) and Incidence of Dementia

|                                                                                           | Depressive symptoms<br>at mean age 50 (45-55) years<br>N dementia/N total = 276/9004<br>Mean FU 21.2 (SD=6.0) years |      | Depressive symptoms<br>at mean age 70 (65-75) years<br>N dementia/N total = 193/5552<br>Mean FU 5.7 (SD=3.7) years |        |
|-------------------------------------------------------------------------------------------|---------------------------------------------------------------------------------------------------------------------|------|--------------------------------------------------------------------------------------------------------------------|--------|
|                                                                                           | HR (95% CI)                                                                                                         | P    | HR (95% CI)                                                                                                        | P      |
| Model 1: Analysis adjusted for age, sex, marital status, ethnicity, education, occupation |                                                                                                                     |      |                                                                                                                    |        |
| <b>GHQ-30</b>                                                                             | Ref.                                                                                                                |      | Ref.                                                                                                               |        |
| caseness                                                                                  | 1.21 (0.93, 1.57)                                                                                                   | 0.16 | 2.65 (1.94, 3.61)                                                                                                  | <0.001 |
| <b>CES-D</b>                                                                              |                                                                                                                     |      |                                                                                                                    |        |
| ≥16 caseness                                                                              |                                                                                                                     |      | 2.11 (1.37, 3.25)                                                                                                  | 0.001  |
| Model 2: Model 1 + health behaviors <sup>a</sup>                                          |                                                                                                                     |      |                                                                                                                    |        |
| <b>GHQ-30</b>                                                                             | Ref.                                                                                                                |      | Ref.                                                                                                               |        |
| caseness                                                                                  | 1.17 (0.89, 1.52)                                                                                                   | 0.26 | 2.54 (1.86, 3.46)                                                                                                  | <0.001 |
| <b>CES-D</b>                                                                              |                                                                                                                     |      |                                                                                                                    |        |
| ≥16 caseness                                                                              |                                                                                                                     |      | 2.09 (1.35, 3.23)                                                                                                  | 0.001  |
| Model 3: Model 2 + chronic conditions <sup>b</sup>                                        |                                                                                                                     |      |                                                                                                                    |        |
| <b>GHQ-30</b>                                                                             | Ref.                                                                                                                |      | Ref.                                                                                                               |        |
| caseness                                                                                  | 1.15 (0.88, 1.50)                                                                                                   | 0.31 | 2.47 (1.80, 3.40)                                                                                                  | <0.001 |
| <b>CES-D</b>                                                                              |                                                                                                                     |      |                                                                                                                    |        |
| ≥16 caseness                                                                              |                                                                                                                     |      | 2.04 (1.30, 3.20)                                                                                                  | 0.002  |

<sup>a</sup>Smoking, alcohol consumption, physical activity, fruit and vegetable consumption.

<sup>b</sup>Diabetes, coronary heart disease, stroke, use of medication for cardiovascular disease, antidepressants.

FU: Follow-up

GHQ-30 caseness: 26.3% at age 45-55 years, 16.0% at age 65-75 years.

CES-D≥16 caseness: 12.5% at age 70y.

**eTable 2.** Difference GHQ-30 and CES-D Scores in the Years Preceding Dementia Between Dementia Cases and Others

| Year                              | GHQ-30 score<br>Range: 0-30                                               |          | CES-D score<br>Range: 0-60                                               |          |
|-----------------------------------|---------------------------------------------------------------------------|----------|--------------------------------------------------------------------------|----------|
|                                   | Difference in score<br>(95% CI)                                           | <i>p</i> | Difference in score<br>(95% CI)                                          | <i>p</i> |
| -28                               | 0.81 (-0.07, 1.68)                                                        | 0.07     |                                                                          |          |
| -27                               | 0.77 (0.05, 1.48)                                                         | 0.04     |                                                                          |          |
| -26                               | 0.71 (0.10, 1.32)                                                         | 0.02     |                                                                          |          |
| -25                               | 0.65 (0.10, 1.19)                                                         | 0.02     |                                                                          |          |
| -24                               | 0.57 (0.06, 1.09)                                                         | 0.03     |                                                                          |          |
| -23                               | 0.50 (-0.01, 1.01)                                                        | 0.06     |                                                                          |          |
| -22                               | 0.43 (-0.09, 0.94)                                                        | 0.11     |                                                                          |          |
| -21                               | 0.36 (-0.16, 0.88)                                                        | 0.18     |                                                                          |          |
| -20                               | 0.29 (-0.23, 0.81)                                                        | 0.27     |                                                                          |          |
| -19                               | 0.24 (-0.28, 0.76)                                                        | 0.37     |                                                                          |          |
| -18                               | 0.20 (-0.32, 0.72)                                                        | 0.45     |                                                                          |          |
| -17                               | 0.18 (-0.33, 0.69)                                                        | 0.49     |                                                                          |          |
| -16                               | 0.18 (-0.33, 0.68)                                                        | 0.49     |                                                                          |          |
| -15                               | 0.20 (-0.30, 0.70)                                                        | 0.43     |                                                                          |          |
| -14                               | 0.25 (-0.24, 0.75)                                                        | 0.32     |                                                                          |          |
| -13                               | 0.34 (-0.17, 0.84)                                                        | 0.19     |                                                                          |          |
| -12                               | 0.45 (-0.06, 0.96)                                                        | 0.08     | 3.69 (1.15, 6.22)                                                        | 0.006    |
| -11                               | 0.61 (0.09, 1.13)                                                         | 0.02     | 2.39 (0.70, 4.09)                                                        | 0.02     |
| -10                               | 0.81 (0.27, 1.34)                                                         | 0.003    | 1.64 (0.29, 3.00)                                                        | 0.04     |
| -9                                | 1.05 (0.50, 1.59)                                                         | <0.001   | 1.36 (0.06, 2.66)                                                        | 0.03     |
| -8                                | 1.34 (0.78, 1.89)                                                         | <0.001   | 1.44 (0.15, 2.74)                                                        | 0.005    |
| -7                                | 1.68 (1.11, 2.24)                                                         | <0.001   | 1.81 (0.55, 3.08)                                                        | <0.001   |
| -6                                | 2.08 (1.50, 2.65)                                                         | <0.001   | 2.38 (1.17, 3.60)                                                        | <0.001   |
| -5                                | 2.53 (1.94, 3.12)                                                         | <0.001   | 3.07 (1.87, 4.27)                                                        | <0.001   |
| -4                                | 3.05 (2.43, 3.67)                                                         | <0.001   | 3.78 (2.57, 5.00)                                                        | <0.001   |
| -3                                | 3.63 (2.97, 4.29)                                                         | <0.001   | 4.44 (3.17, 5.71)                                                        | <0.001   |
| -2                                | 4.28 (3.55, 5.02)                                                         | <0.001   | 4.95 (3.60, 6.30)                                                        | <0.001   |
| -1                                | 5.01 (4.16, 5.85)                                                         | <0.001   | 5.23 (3.71, 6.74)                                                        | <0.001   |
| 0                                 | 5.81 (4.81, 6.81)                                                         | <0.001   | 5.18 (3.28, 7.09)                                                        | <0.001   |
| <b>Difference in trajectories</b> | Wald chi-squared test with 3 degrees of freedom = 126.85; <i>p</i> <0.001 |          | Wald chi-squared test with 3 degrees of freedom = 21.52; <i>p</i> <0.001 |          |

Model adjusted for age at year 0, sex, ethnicity, education, 5-year birth cohort, and time-dependent occupational position, and marital status.

**eFigure 1.** Trajectory of Global Cognitive Score in Dementia Cases and Other Participants in the Years Leading to Dementia Diagnosis

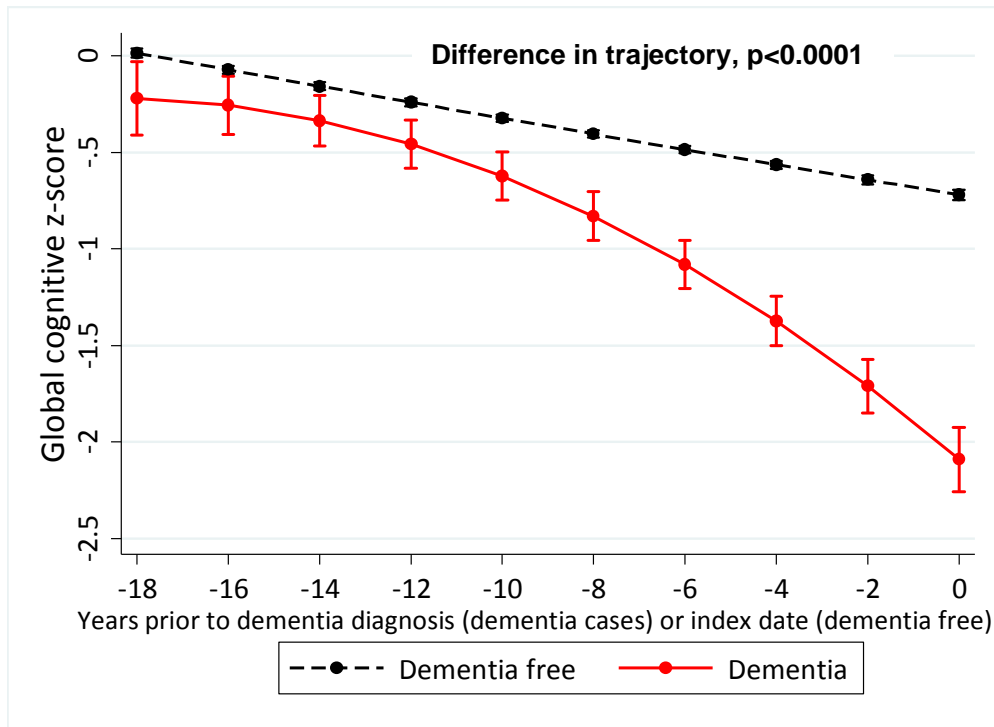

**Number of observations in the analysis**

| Years                         | -18 to -16 | -16 to -12 | -12 to -8 | -8 to -4 | -4 to 0 |
|-------------------------------|------------|------------|-----------|----------|---------|
| <b>Dementia free (N=7311)</b> | 5192       | 2489       | 3714      | 5938     | 4777    |
| <b>Dementia cases (N=195)</b> | 31         | 81         | 119       | 110      | 89      |

**eFigure 2.** Study Design to Assess Association of Dementia Risk With GHQ Caseness\* and GHQ-30 Trajectories

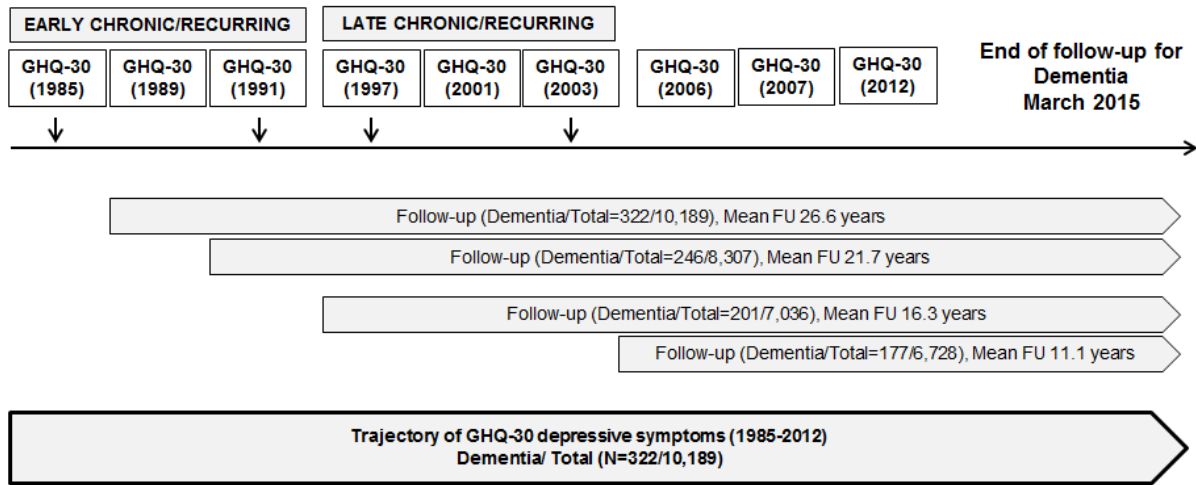

FU: Follow-up

\*Early and late chronic GHQ-30 caseness requires at least 2 out of the 3 corresponding measures.

**eFigure 3.** Trajectories of Depressive Symptoms Preceding Dementia Using Cubic Regression Splines

**A. GHQ-30 score**

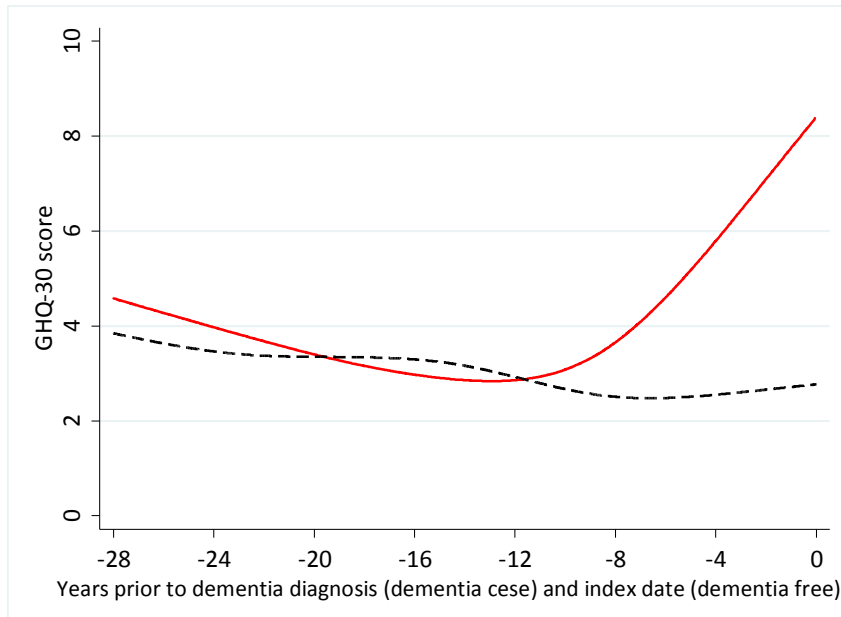

**B. CES-D score**

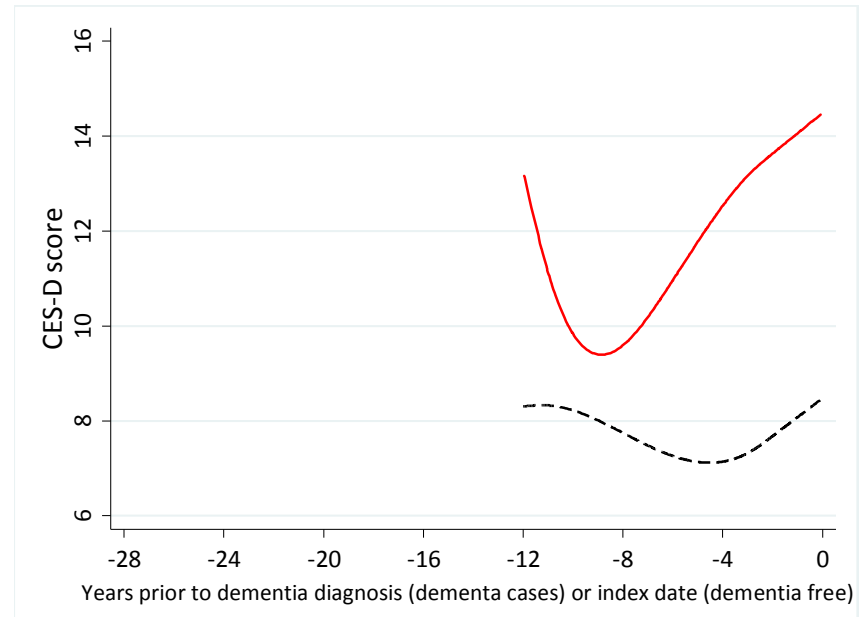

Legend — Dementia cases     Dementia free
